# Supplementary material
Source: ML conference proceedings conference paper supplement (https://openaccess.thecvf.com/content/CVPR2023/html/Kwon_Renderable_Neural_Radiance_CVPR_2023_paper.html)
Supplement: Supplementary file 1 [file Kwon_Renderable_Neural_Radiance_CVPR_2023_supplemental.zip]

Archive with 2 entries (2 files):
- 2023_CVPR_RNR-Map_supplementary.pdf
- 2023_CVPR_RNR-Map_supplementary_video.mp4.mp4
